# Supplementary material
Source: PubMed Central journal article supplement (PMC9706443)
Supplement: NIHMS1629108-supplement-1.pdf [file NIHMS1629108-supplement-1.pdf]

## **PATH/Ekkubo Study**

**NCT02545673**

**2015-2020**

**PIs: Susan M. Kiene & Rhoda K. Wanyenze**

**Funded by the National Institute of Mental Health  
R01MH106391**

### **Brief Baseline Questionnaire**

(Conducted with all eligible individuals consenting to participate in the baseline interview and home-based HIV testing and counseling)

Data were collected in via interviewer-administered interviews using encrypted [Kobo Collect](#) forms on Android tablets in the home or nearby location prior to HIV testing.

Automatically captured within data collection form by the Kobo Collect app:

- GPS coordinates
- Device ID
- Date
- Current time (start, end)

Information entered into data collection form in Kobo Collect by interviewer:

- Staff ID
- Village
- Household ID
- Participant ID
- Participant's gender: Male, Female

## DEMOGRAPHICS AND SES

*First, I'm going to ask you some basic questions about yourself*

|      |                                                                                                                                         |                                                                                                                                                     |
|------|-----------------------------------------------------------------------------------------------------------------------------------------|-----------------------------------------------------------------------------------------------------------------------------------------------------|
| DEM1 | What is your age?<br>Validation criteria <=59, >14                                                                                      |                                                                                                                                                     |
| DEM2 | What is your tribe?                                                                                                                     | Muganda (0)<br>Munyarwanda<br>Munyoro<br>Murundi<br>Mukiga<br>Mutooro<br>Munyankole<br>Other (7)                                                    |
| DEM3 | What is your religion?                                                                                                                  | Protestant (Anglican, Lutheran, Church of Uganda) (0)<br>Catholic<br>Moslem<br>Seventh Day Adventist<br>Saved/Pentecostal<br>None<br>Other (6)      |
| DEM4 | Are you currently married, separated, widowed, divorced, or have you never been married? (Use participant's own definition of marriage) | Married and living together most of the time. (4)<br>Married and separated most of the time (3)<br>Widowed (2)<br>Divorced (1)<br>Never married (0) |
| DEM5 | <b>[If Q4 = 3 or 4, WOMEN ONLY]</b> How many wives does your husband have (including you)?<br><br>(If she's the only wife, enter 1)     | 1<br>2<br>3<br>4<br>5<br>6<br>7<br>8<br>More than 8 (99)<br>Don't know(77)                                                                          |
| DEM6 | <b>[If Q4=3 or 4, MEN ONLY]</b> How many wives do you have?                                                                             |                                                                                                                                                     |
| DEM7 | What is the highest level of school you completed?                                                                                      | No schooling (0)<br>P1<br>P2<br>P3<br>P4<br>P5<br>P6<br>P7<br>S1<br>S2<br>S3<br>S4<br>S5<br>S6<br>Tertiary/Vocational<br>University or greater (15) |
| DEM8 | During the last year how often did you work for money?                                                                                  | Throughout the year (3)<br>Part of the year (2)<br>Once in a while (1)<br>Never (0)                                                                 |
| DEM9 | What is the primary way you support yourself (and your family)?                                                                         | Farming (0)                                                                                                                                         |

|                                                                  |                                                                                                                                                                                 |                                                                                                                                                                                                                       |
|------------------------------------------------------------------|---------------------------------------------------------------------------------------------------------------------------------------------------------------------------------|-----------------------------------------------------------------------------------------------------------------------------------------------------------------------------------------------------------------------|
|                                                                  |                                                                                                                                                                                 | Selling goods at market (1)<br>Working for someone else (2)<br>Part-time work (3)<br>Working—other (4)<br>Getting money/goods from spouse or relatives (5)<br>Getting money/goods from other people (6)<br>Other (77) |
| DEM10                                                            | In the last 12 months, on how many separate occasions have you traveled away from this community (the community where you usually live) and slept away?<br><br>If none, write 0 |                                                                                                                                                                                                                       |
| DEM11                                                            | In the last 12 months, have you been away from your home community for more than one month at a time for WORK?                                                                  | Yes (1)<br>No (0)                                                                                                                                                                                                     |
| DEM12                                                            | How much do you usually earn per month?                                                                                                                                         |                                                                                                                                                                                                                       |
| <i>Now I'm going to ask you about your household possessions</i> |                                                                                                                                                                                 |                                                                                                                                                                                                                       |
| DEM13                                                            | Does your household have electricity?                                                                                                                                           | Yes (1)<br>No (0)                                                                                                                                                                                                     |
| DEM14                                                            | Does your household have a television?                                                                                                                                          | Yes (1)<br>No (0)                                                                                                                                                                                                     |
| DEM15                                                            | Does your household have a sofa set?                                                                                                                                            | Yes (1)<br>No (0)                                                                                                                                                                                                     |
| DEM16                                                            | Does your household have a refrigerator?                                                                                                                                        | Yes (1)<br>No (0)                                                                                                                                                                                                     |
| DEM17                                                            | Does your household have a cupboard?                                                                                                                                            | Yes (1)<br>No (0)                                                                                                                                                                                                     |
| DEM18                                                            | Does your household have a clock?                                                                                                                                               | Yes (1)<br>No (0)                                                                                                                                                                                                     |
| DEM19                                                            | Does your household have a mobile phone?                                                                                                                                        | Yes (1)<br>No (0)                                                                                                                                                                                                     |
| DEM20                                                            | Does your household have a bed?                                                                                                                                                 | Yes (1)<br>No (0)                                                                                                                                                                                                     |
| DEM21                                                            | Do you have your own mobile phone?                                                                                                                                              | Yes (1)<br>No (0)                                                                                                                                                                                                     |
| DEM22                                                            | What type of fuel does your household use for cooking?<br><br>Hint: If more than one, chose the one that is used most                                                           | Electricity(0)<br>Bottled gas<br>Paraffin/kerosene<br>Charcoal<br>Firewood<br>Crop residuals, straw, grass<br>Animal dung<br>No food cooked in household<br>other(7)                                                  |
| DEM23                                                            | What kind of toilet facility do members of your household usually use?<br><br>Hint: If more than 1, chose the one that is used most                                             | Flush Toilet (0)<br>Vip Latrine<br>Covered Pit Latrine, No Slab<br>Covered Pit Latrine, With Slab<br>Uncovered Pit Latrine, No Slab<br>Uncovered Pit Latrine, With Slab<br>No Facility/Bush/Field (6)                 |
| DEM24                                                            | [Interviewer observe and record: Main material of the EXTERIOR WALLS]<br>Choose only one                                                                                        | Natural Walls (0)<br>Thatched/Straw<br>Rudimentary Walls<br>Mud And Poles<br>Un-Burnt Bricks<br>Un-Burnt Bricks With Plaster Burnt Bricks                                                                             |

|       |                                                                                    |                                                                                                                                                               |
|-------|------------------------------------------------------------------------------------|---------------------------------------------------------------------------------------------------------------------------------------------------------------|
|       |                                                                                    | With Mud<br>Finished Walls<br>Cement Blocks<br>Stone<br>Timber<br>Burnt Bricks With Cement<br>Other(9)                                                        |
| DEM25 | [Interviewer observe and record: Main material of the ROOF]<br><br>Choose only one | Natural Roofing (0)<br>Thatched<br>Mud<br>Finished Roofing<br>Wood/Planks<br>Iron Sheets<br>Asbestos<br>Tiles<br>Tin<br>Cement<br>Other (9)                   |
| DEM26 | [Interviewer observe and record: Main material of the FLOOR]<br>Choose only one    | Natural Floor (0)<br>Earth/Sand<br>Earth And Dung<br>Finished Floor<br>Parquet Or Polished Wood<br>Mosaic Or Tiles<br>Bricks<br>Cement<br>Stones<br>Other (9) |

**USE of HEALTHCARE SERVICES**

*Now I am going to ask you about the healthcare services you have received.*

|     |                                                                                     |                                                                                                                                                                                                                                                                                                                                                                                                                                                                                                                                                                                                                                                                                                                                                                                    |
|-----|-------------------------------------------------------------------------------------|------------------------------------------------------------------------------------------------------------------------------------------------------------------------------------------------------------------------------------------------------------------------------------------------------------------------------------------------------------------------------------------------------------------------------------------------------------------------------------------------------------------------------------------------------------------------------------------------------------------------------------------------------------------------------------------------------------------------------------------------------------------------------------|
| HS1 | Have you ever received these services at a health facility? (Select all that apply) | Malaria care (0)<br>Family planning (1)<br>Vaccination (2)<br>Antenatal care (3)<br>Dental care (4)<br>Mental health (5)<br>Alcohol/addiction services (6)<br>Circumcision (7)<br>Other (8)                                                                                                                                                                                                                                                                                                                                                                                                                                                                                                                                                                                        |
| HS2 | Which health facility do you usually go to?                                         | Bulo HC (Butambala district)<br>Butaaka HC (Butambala district)<br>Epicenter(Senge)HC (Butambala district)<br>Gombe Hospital (Butambala district)<br>Kabasanda HC (Butambala district)<br>Kibugga HC (Butambala district)<br>Kirokola HC (Butambala district)<br>Kitimba HC (Butambala district)<br>Kiziiko HC (Butambala district)<br>Kyabaddaza HC (Butambala district)<br>Ngando HC (Butambala district)<br>Nsozibiryie HC (Butambala district)<br>Ntolomwe HC (Butambala district)<br>Maria Assumpta HC (Butambala district)<br>Bugobango HC (Butambala district)<br>Kalamba HC (Butambala district)<br>Sanyu Domiciliary (Butambala district)<br>Savio Medical Centre (Butambala district)<br>Kawonawo Dom (Butambala district)<br>Doctor's Clinic, Bulo (Butambala district) |

|     |                                                                                                                                                         |                                                                                                                                                                                                                                                                                                                                                                                                                                                                                                                                                                                                                                                                                                                                                                                                                                                                                                                                                                                                                                                                                                                                                                                                                                                                                                                 |
|-----|---------------------------------------------------------------------------------------------------------------------------------------------------------|-----------------------------------------------------------------------------------------------------------------------------------------------------------------------------------------------------------------------------------------------------------------------------------------------------------------------------------------------------------------------------------------------------------------------------------------------------------------------------------------------------------------------------------------------------------------------------------------------------------------------------------------------------------------------------------------------------------------------------------------------------------------------------------------------------------------------------------------------------------------------------------------------------------------------------------------------------------------------------------------------------------------------------------------------------------------------------------------------------------------------------------------------------------------------------------------------------------------------------------------------------------------------------------------------------------------|
|     |                                                                                                                                                         | Rapha medical center (Butambala district)<br>Kiddawalime nursing home (Butambala district)<br>Kibibi nursing home (Butambala district)<br>Butende HC (Butambala district)<br>Kolokola HC (Butambala district)<br>Kiziiko HC (Butambala district)<br>Mitala-Maria (Mpigi District)<br>Bunjako (Mpigi District)<br>Buwama (Mpigi District)<br>Buwana Police Clinic (Mpigi District)<br>Bukasa (Mpigi District)<br>Kittintu (Mpigi District)<br>Nkozi Hospital (Mpigi District)<br>Golo (Mpigi District)<br>Nabyewanga (Mpigi District)<br>Nindye (Mpigi District)<br>Butoolo (Mpigi District)<br>Goli (Mpigi District)<br>Kampilingisa (Mpigi District)<br>St. Micheal Kanyike (Mpigi District)<br>Kibanga (Mpigi District)<br>Buyiga (Mpigi District)<br>St. Monica Katende (Mpigi District)<br>Epi Centre Kiringente (Mpigi District)<br>Watoto (Mpigi District)<br>Sekiwunga (Mpigi District)<br>Kkonge (Mpigi District)<br>Kafumu (Mpigi District)<br>Kyali (Mpigi District)<br>Mpigi Police (Mpigi District)<br>Mpigi Hc Iv (Mpigi District)<br>Double Cure (Mpigi District)<br>Ddhs's Clinic (Mpigi District)<br>Mpigi Orthodox (Mpigi District)<br>Kibumbiro (Mpigi District)<br>Jjeza (Mpigi District)<br>Bujuko (Mpigi District)<br>Nswanjere (Mpigi District)<br>Muduuma (Mpigi District)<br>Other (77) |
| HS3 | How many times in the past 6 months have you experienced significant physical medical problems? (Please fill in the number)                             |                                                                                                                                                                                                                                                                                                                                                                                                                                                                                                                                                                                                                                                                                                                                                                                                                                                                                                                                                                                                                                                                                                                                                                                                                                                                                                                 |
| HS4 | How many times in the past 6 months have you needed medical care but were unable to get to the clinic or receive treatment? (Please fill in the number) | If 0 → skip to HS6                                                                                                                                                                                                                                                                                                                                                                                                                                                                                                                                                                                                                                                                                                                                                                                                                                                                                                                                                                                                                                                                                                                                                                                                                                                                                              |
| HS5 | Why were you unable to get medical care in these situations? (choose all that apply)                                                                    | Lack of transport to the hospital/clinic(0)<br>Hospital too far away<br>No money to pay for services<br>Husband/wife would not let you go<br>Had to care for children at home<br>You would have had to wait too long<br>You waited but the clinician was not able to see you that day<br>You didn't want to be seen at the hospital/clinic<br>You didn't think the hospital/clinic could treat my medical problem<br>You didn't think the problem was serious enough to go to the clinic/hospital(9)<br>Other (77)                                                                                                                                                                                                                                                                                                                                                                                                                                                                                                                                                                                                                                                                                                                                                                                              |
| HS6 | How many times in the past 6 months have you received medical care at a clinic or hospital? (Please fill in the number)                                 | If 0 → skip to HS12                                                                                                                                                                                                                                                                                                                                                                                                                                                                                                                                                                                                                                                                                                                                                                                                                                                                                                                                                                                                                                                                                                                                                                                                                                                                                             |
| HS7 | Of the times you received medical care in the past 6 months, how many                                                                                   |                                                                                                                                                                                                                                                                                                                                                                                                                                                                                                                                                                                                                                                                                                                                                                                                                                                                                                                                                                                                                                                                                                                                                                                                                                                                                                                 |

|      |                                                                                                                                               |                                                                                                                                                                                                 |
|------|-----------------------------------------------------------------------------------------------------------------------------------------------|-------------------------------------------------------------------------------------------------------------------------------------------------------------------------------------------------|
|      | times did you pay for the services? Please fill in the number                                                                                 |                                                                                                                                                                                                 |
| HS8  | Of the times you received medical care in the last 6 months how many times did you receive treatment/medication? Please fill in the number    |                                                                                                                                                                                                 |
| HS9  | Of the times you received medical care in the last 6 months how many times were you unable to get treatment/medication?                       | If 0 → skip next question                                                                                                                                                                       |
| HS10 | Why were you unable to get treatment/medication? (choose all that apply)                                                                      | Stock out<br>Too long to wait<br>Did not have money to pay<br>Other(77)                                                                                                                         |
| HS11 | How many times in the past 6 months have you been admitted/hospitalized for <u>physical medical</u> problems? (If never enter 0).             |                                                                                                                                                                                                 |
| HS12 | How many times in the past 6 months have you sought treatment from traditional healer? (If never enter 0).                                    |                                                                                                                                                                                                 |
| HS13 | How many living biological children do you have?                                                                                              |                                                                                                                                                                                                 |
| HS14 | <b>[If HS13&gt;0, WOMEN ONLY]</b> Where did you deliver your most recent child?                                                               | At health facility (0)<br>traditional birth attendant (1)<br>At home (2)                                                                                                                        |
| HS15 | How long does it take you to get to the health facility? (one way)                                                                            | Minutes _____                                                                                                                                                                                   |
| HS16 | What form of transportation do you usually take to get to the health facility? Choose the transportation that is most used                    | Walking (0)<br>Bicycle (1)<br>Taxi (2)<br>boda boda (3)<br>Privately owned car (4)<br>Special hire (5)<br>Other (77)                                                                            |
| HS17 | <b>[MEN ONLY]</b> People have different reasons for not being circumcised. Are you circumcised?                                               | Yes (1)<br>No (0)                                                                                                                                                                               |
| HS18 | [if no to HS17] Why have you not gotten circumcised? Choose all that apply                                                                    | You're afraid(o)<br>Only Muslims get circumcised<br>Difficult to access<br>It could affect your performance<br>Low quality of the service<br>You don't think there is a benefit(5)<br>Other(77) |
| HS19 | [If no to HS17] Would you be interested in getting circumcised?                                                                               | Yes(1)<br>No(0)                                                                                                                                                                                 |
| HS20 | <b>[WOMEN ONLY, IF MARRIED AND LIVING TOGETHER MOST OF THE TIME, IF MARRIED AND SEPARATED MOST OF THE TIME ]</b> Is your husband circumcised? | Yes (1)<br>No (0)                                                                                                                                                                               |
| HS21 | Do you think circumcision helps protect men from getting HIV?                                                                                 | Yes (1)<br>No (0)<br>Don't know(88)                                                                                                                                                             |

### HIV-TESTING HISTORY

Now I'm going to ask you a few questions about HIV testing

|       |                                                                                                                                                       |                                                                                                                                      |
|-------|-------------------------------------------------------------------------------------------------------------------------------------------------------|--------------------------------------------------------------------------------------------------------------------------------------|
| HIVT1 | Have you ever had an HIV blood test?                                                                                                                  | Yes (1)<br>No (0)                                                                                                                    |
| HIVT2 | [If YES to HIVT1] How many times have you had an HIV blood test?                                                                                      |                                                                                                                                      |
| HIVT3 | [If YES to HIVT1] When was the last time you were tested for HIV with a blood test?<br>(If the participant is unsure, help them to identify the time) | During the prior 3 months (0)<br>During the prior 6 months<br>During the prior year<br>1 to 2 years ago<br>More than 2 years ago (4) |
| HIVT4 | [If YES to HIVT1] Where did you get this test?                                                                                                        | Bulo HCIII (Butambala district)                                                                                                      |

|                                                                                    |                                                                             |                                                                                                                                                                                                                                                                                                                                                                                                                                                                                                                                                                                                                                                                                                                                                                                                                                                                                |
|------------------------------------------------------------------------------------|-----------------------------------------------------------------------------|--------------------------------------------------------------------------------------------------------------------------------------------------------------------------------------------------------------------------------------------------------------------------------------------------------------------------------------------------------------------------------------------------------------------------------------------------------------------------------------------------------------------------------------------------------------------------------------------------------------------------------------------------------------------------------------------------------------------------------------------------------------------------------------------------------------------------------------------------------------------------------|
|                                                                                    |                                                                             | Kitimba HCIII (Butambala district)<br>Epicenter HCIII (Butambala district)<br>Kyabadaza HC III (Butambala district)<br>Ngando HCIII (Butambala district)<br>Gombe Hospital (Butambala district)<br>Clinic in Kampala<br>Kibibi Nursing Home (Butambala district)<br>Rapha Medical Centre (Butambala district)<br>Buwama HCIII (Butambala district)<br>Mpigi Health Centre IV (Mpigi district)<br>Nkozi Hospital (Mpigi district)<br>Maria Assumpta –Bulo (Butambala district)<br>Epicenter Kiringente (Mpigi district)<br>Kittintu HCIII (Mpigi district)<br>Golo HCIII (Mpigi district)<br>Nindye HCIII (Mpigi district)<br>Kampilingisa HCIII (Mpigi district)<br>Sekiwunga HCIII (Mpigi district)<br>Kyali HCIII (Mpigi district)<br>Muduuma HCIII (Mpigi district)<br>St. Elizabeth Kibanga HCIII (Mpigi district)<br>St. Michael Kanyyike HCIII (Mpigi district)<br>Other |
| HIVT4a                                                                             | Other location of HIV test                                                  |                                                                                                                                                                                                                                                                                                                                                                                                                                                                                                                                                                                                                                                                                                                                                                                                                                                                                |
| HIVT5                                                                              | [If YES to HIVT1] What was the result of the test?                          | HIV negative (0)<br>HIV positive (1)<br>Don't remember ()<br>Declined to answer(8)                                                                                                                                                                                                                                                                                                                                                                                                                                                                                                                                                                                                                                                                                                                                                                                             |
| <b>IF PREVIOUSLY TESTED HIV POSITIVE ASK THE FOLLOWING QUESTIONS: (If HIVT5=1)</b> |                                                                             |                                                                                                                                                                                                                                                                                                                                                                                                                                                                                                                                                                                                                                                                                                                                                                                                                                                                                |
| LINK1                                                                              | [If HIV positive] Have you received medical care or treatment for your HIV? | Yes(1)<br>No(0)                                                                                                                                                                                                                                                                                                                                                                                                                                                                                                                                                                                                                                                                                                                                                                                                                                                                |
| LINK2                                                                              | If no, Why haven't you received medical care or treatment for your HIV?     | Did not know treatment is free(0)<br>Did not get test results card showing HIV positive results<br>Afraid to be seen at the HIV clinic<br>Don't like the providers at the HIV clinic<br>Don't want to go for treatment<br>Other reason(5)                                                                                                                                                                                                                                                                                                                                                                                                                                                                                                                                                                                                                                      |
| LINK3                                                                              | If yes to LINK1 , Where did you last receive care or treatment for HIV?     | Bulo HCIII (Butambala district)<br>Kitimba HCIII (Butambala district)<br>Epicenter HCIII (Butambala district)<br>Kyabadaza HC III (Butambala district)<br>Ngando HCIII (Butambala district)<br>Gombe Hospital (Butambala district)<br>Clinic in Kampala<br>Kibibi Nursing Home (Butambala district)<br>Rapha Medical Centre (Butambala district)<br>Buwama HCIII (Butambala district)<br>Mpigi Health Centre IV (Mpigi district)<br>Nkozi Hospital (Mpigi district)<br>Maria Assumpta –Bulo (Butambala district)<br>Epicenter Kiringente (Mpigi district)<br>Kittintu HCIII (Mpigi district)<br>Golo HCIII (Mpigi district)<br>Nindye HCIII (Mpigi district)<br>Kampilingisa HCIII (Mpigi district)<br>Sekiwunga HCIII (Mpigi district)<br>Kyali HCIII (Mpigi district)                                                                                                        |



|        |                                                                                                                                  |                                                                                                                                        |
|--------|----------------------------------------------------------------------------------------------------------------------------------|----------------------------------------------------------------------------------------------------------------------------------------|
|        |                                                                                                                                  | Muduuma HCIII (Mpigi district)<br>St. Elizabeth Kibanga HCIII (Mpigi district)<br>St. Michael Kanyyike HCIII (Mpigi district)<br>Other |
| LINK4  | If yes LINK1, When was the last time you attended the HIV clinic?                                                                | Date                                                                                                                                   |
| LINK5a | Have you ever had your CD4 taken?<br>(If No, ask again to make sure they know what CD4 count is)                                 | Yes<br>No                                                                                                                              |
| LINK5b | {If yes to LINK5b) When did you last have your CD4 taken?: Help them to identify date either from their card or through probing. | ____ Date                                                                                                                              |
| LINK6  | [If yes to LINK5a] What was your CD4 count?                                                                                      |                                                                                                                                        |
| LINK7  | Are you taking treatment for HIV?                                                                                                | Yes<br>No                                                                                                                              |
| LINK8  | [If yes to LINK7] What treatment are you taking? (choose all that apply)                                                         | ARVs<br>Co-trimoxazole                                                                                                                 |

**[Ask next set of questions of all participants]**

|           |                                                                                                                                               |                                                                                     |
|-----------|-----------------------------------------------------------------------------------------------------------------------------------------------|-------------------------------------------------------------------------------------|
| HIVT7     | Is anyone in your household HIV positive? (note to interviewer: if person is HIV positive, ask about household members other than themselves) | Yes<br>No<br>Don't know<br>[If No, or don't know, skip to next section]             |
| HIVT8     | How many household members are HIV positive?<br>(If the participant is HIV positive him/herself, exclude him/her in the count)                |                                                                                     |
| HIVT9_001 | Is this person your (Person 1):<br>(question asked for up to 3 family members)                                                                | Spouse<br>Boyfriend/Girlfriend<br>Child<br>Parent<br>Sibling<br>Other family member |
| HBT10_001 | Are they currently enrolled in HIV care? (Person 1)                                                                                           | Yes(1)<br>No(0)<br>Don't know (77)                                                  |
| HIVT9_002 | [If 2 or more positive household members]<br>Is this person your(Person 2):                                                                   | Spouse<br>Boyfriend/Girlfriend<br>Child<br>Parent<br>Sibling<br>Other family member |
| HBT10_002 | [If 2 or more positive household members]<br>Are they currently enrolled in HIV care? (Person 2)                                              | Yes(1)<br>No(0)<br>Don't know (77)                                                  |
| HIVT9_003 | [If 3 or more positive household members]<br>Is this person your(Person 3):                                                                   | Spouse<br>Boyfriend/Girlfriend<br>Child<br>Parent<br>Sibling<br>Other family member |
| HBT10_003 | [If 3 or more positive household members]<br>Are they currently enrolled in HIV care? (Person 3)                                              | Yes(1)<br>No(0)<br>Don't know (77)                                                  |

**HIV STIGMA**

**[Only for those who said they previously tested HIV negative, don't remember their results, never tested or declined to answer] HIVT5~=1**

*I'm going to read you some statements about what some people may believe about people with HIV and I want you to tell me if you agree or disagree with the statements.*

|          |                                                                               |                                                                                                            |
|----------|-------------------------------------------------------------------------------|------------------------------------------------------------------------------------------------------------|
| ENSTIGN1 | People who have HIV are dirty.                                                | Strongly agree (4)<br>Agree (3)<br>Neither agree nor disagree (2)<br>Disagree (1)<br>Strongly disagree (0) |
| ENSTIGN2 | People who have HIV are cursed.                                               | Strongly agree (4)<br>Agree (3)<br>Neither agree nor disagree (2)<br>Disagree (1)<br>Strongly disagree (0) |
| ENSTIGN3 | People who have HIV should be ashamed.                                        | Strongly agree (4)<br>Agree (3)<br>Neither agree nor disagree (2)<br>Disagree (1)<br>Strongly disagree (0) |
| ENSTIG4  | It is safe for people who have HIV to work with children.                     | Strongly agree (4)<br>Agree (3)<br>Neither agree nor disagree (2)<br>Disagree (1)<br>Strongly disagree (0) |
| ENSTIGN5 | People with HIV must expect some restrictions on their freedom.               | Strongly agree (4)<br>Agree (3)<br>Neither agree nor disagree (2)<br>Disagree (1)<br>Strongly disagree (0) |
| ENSTIGN6 | A person with HIV must have done something wrong and deserves to be punished. | Strongly agree (4)<br>Agree (3)<br>Neither agree nor disagree (2)<br>Disagree (1)<br>Strongly disagree (0) |
| ENSTIGN7 | People who have HIV should be isolated.                                       | Strongly agree (4)<br>Agree (3)<br>Neither agree nor disagree (2)<br>Disagree (1)<br>Strongly disagree (0) |
| ENSTIGN8 | You do not want to be friends with someone who has HIV.                       | Strongly agree (4)<br>Agree (3)<br>Neither agree nor disagree (2)<br>Disagree (1)<br>Strongly disagree (0) |
| ENSTIGN9 | People have HIV should not be allowed to work.                                | Strongly agree (4)<br>Agree (3)<br>Neither agree nor disagree (2)<br>Disagree (1)<br>Strongly disagree (0) |

**[Only for those who said they previously tested HIV negative, don't remember their results, never tested, or declined to answer] HIVT5~=1**

*Now I want to know how you would feel if you tested HIV positive. I want you to tell me if you agree or disagree with these statements.*

|         |                                                                                                  |                                                                                                            |
|---------|--------------------------------------------------------------------------------------------------|------------------------------------------------------------------------------------------------------------|
| ASTIGN1 | If you were to test HIV positive you would feel that you need to hide the fact that you have HIV | Strongly agree (4)<br>Agree (3)<br>Neither agree nor disagree (2)<br>Disagree (1)<br>Strongly disagree (0) |
| ASTIGN2 | If you were to test HIV positive you would worry people who know you have HIV                    | Strongly agree (4)                                                                                         |

|         |                                                                                                                                          |                                                                                                            |
|---------|------------------------------------------------------------------------------------------------------------------------------------------|------------------------------------------------------------------------------------------------------------|
|         | would tell others                                                                                                                        | Agree (3)<br>Neither agree nor disagree (2)<br>Disagree (1)<br>Strongly disagree (0)                       |
| ASTIGN3 | If you were to test HIV positive you would feel that you have to be very careful whom you tell that you have HIV                         | Strongly agree (4)<br>Agree (3)<br>Neither agree nor disagree (2)<br>Disagree (1)<br>Strongly disagree (0) |
| ASTIGN4 | If you were to test HIV positive you would worry that in this community most people think a person with HIV is disgusting                | Strongly agree (4)<br>Agree (3)<br>Neither agree nor disagree (2)<br>Disagree (1)<br>Strongly disagree (0) |
| ASTIGN5 | If you were to test HIV positive you would worry that in this community most people with HIV are rejected when others learn you have HIV | Strongly agree (4)<br>Agree (3)<br>Neither agree nor disagree (2)<br>Disagree (1)<br>Strongly disagree (0) |
| ASTIGN6 | If you were to test HIV positive you would worry that in this community people believe a person who has HIV is dirty                     | Strongly agree (4)<br>Agree (3)<br>Neither agree nor disagree (2)<br>Disagree (1)<br>Strongly disagree (0) |

*Next, I want you to think about if you tested HIV positive how likely is it that people would treat you in the following ways in the future because of your HIV status. I want to know how likely or unlikely you think each of the following things are.*

|          |                                                      |                                                                                                       |
|----------|------------------------------------------------------|-------------------------------------------------------------------------------------------------------|
| ASTIGN7  | Family members would avoid you                       | Very likely (4)<br>Likely (3)<br>Neither likely nor unlikely (2)<br>Unlikely (1)<br>Very unlikely (0) |
| ASTIGN8  | Family members would look down on you.               | Very likely (4)<br>Likely (3)<br>Neither likely nor unlikely (2)<br>Unlikely (1)<br>Very unlikely (0) |
| ASTIGN9  | Family members would treat you differently.          | Very likely (4)<br>Likely (3)<br>Neither likely nor unlikely (2)<br>Unlikely (1)<br>Very unlikely (0) |
| ASTIGN10 | Healthcare workers will not listen to your concerns. | Very likely (4)<br>Likely (3)<br>Neither likely nor unlikely (2)<br>Unlikely (1)<br>Very unlikely (0) |
| ASTIGN11 | Healthcare workers will avoid touching you.          | Very likely (4)<br>Likely (3)<br>Neither likely nor unlikely (2)<br>Unlikely (1)<br>Very unlikely (0) |
| ASTIGN12 | Healthcare workers will treat you with less respect. | Very likely (4)<br>Likely (3)<br>Neither likely nor unlikely (2)<br>Unlikely (1)<br>Very unlikely (0) |

**[ONLY FOR THOSE WHO SAID THEY PREVIOUSLY TESTED HIV POSITIVE] HIVT5=1**

*Next, I want you to tell me how much you agree with the statements I read.*

|        |                                                         |                                 |
|--------|---------------------------------------------------------|---------------------------------|
| ISTIG1 | It is difficult to tell people about your HIV infection | Strongly agree (4)<br>Agree (3) |
|--------|---------------------------------------------------------|---------------------------------|

|         |                                                             |                                                                                                            |
|---------|-------------------------------------------------------------|------------------------------------------------------------------------------------------------------------|
|         |                                                             | Neither agree nor disagree (2)<br>Disagree (1)<br>Strongly disagree (0)                                    |
| ISTIG2  | Being HIV positive makes you feel dirty                     | Strongly agree (4)<br>Agree (3)<br>Neither agree nor disagree (2)<br>Disagree (1)<br>Strongly disagree (0) |
| ISTIG3  | You feel guilty that you are HIV positive                   | Strongly agree (4)<br>Agree (3)<br>Neither agree nor disagree (2)<br>Disagree (1)<br>Strongly disagree (0) |
| ISTIG4  | You feel ashamed that you are HIV positive                  | Strongly agree (4)<br>Agree (3)<br>Neither agree nor disagree (2)<br>Disagree (1)<br>Strongly disagree (0) |
| ISTIG5  | You sometimes feel worthless because you are HIV positive   | Strongly agree (4)<br>Agree (3)<br>Neither agree nor disagree (2)<br>Disagree (1)<br>Strongly disagree (0) |
| ISTIG6  | You hide your HIV status from others                        | Strongly agree (4)<br>Agree (3)<br>Neither agree nor disagree (2)<br>Disagree (1)<br>Strongly disagree (0) |
| ISTIG7  | Having HIV makes you feel like you are a bad person         | Strongly agree (4)<br>Agree (3)<br>Neither agree nor disagree (2)<br>Disagree (1)<br>Strongly disagree (0) |
| ISTIG8  | You feel you are not as good as others because you have HIV | Strongly agree (4)<br>Agree (3)<br>Neither agree nor disagree (2)<br>Disagree (1)<br>Strongly disagree (0) |
| ISTIG 9 | You think less of yourself because you have HIV             | Strongly agree (4)<br>Agree (3)<br>Neither agree nor disagree (2)<br>Disagree (1)<br>Strongly disagree (0) |
| ISTIG10 | Having HIV makes you feel unclean.                          | Strongly agree (4)<br>Agree (3)<br>Neither agree nor disagree (2)<br>Disagree (1)<br>Strongly disagree (0) |

**[ONLY FOR THOSE WHO SAID THEY PREVIOUSLY TESTED HIV POSITIVE] HIVT5=1**

*I want to understand if you feel some things people may feel when the have HIV. I am going to read you some statements and I want you to tell me whether you agree or disagree with them.*

|         |                                                           |                                                                                                            |
|---------|-----------------------------------------------------------|------------------------------------------------------------------------------------------------------------|
| ASTIGP1 | You feel that you need to hide the fact that you have HIV | Strongly agree (4)<br>Agree (3)<br>Neither agree nor disagree (2)<br>Disagree (1)<br>Strongly disagree (0) |
| ASTIGP2 | You worry people who know you have HIV will tell others   | Strongly agree (4)<br>Agree (3)<br>Neither agree nor disagree (2)<br>Disagree (1)<br>Strongly disagree (0) |
| ASTIGP3 | You are very careful whom you tell that you have HIV      | Strongly agree (4)                                                                                         |

|         |                                                                                      |                                                                                                            |
|---------|--------------------------------------------------------------------------------------|------------------------------------------------------------------------------------------------------------|
|         |                                                                                      | Agree (3)<br>Neither agree nor disagree (2)<br>Disagree (1)<br>Strongly disagree (0)                       |
| ASTIGP4 | You worry that in this community most people think a person with HIV is disgusting   | Strongly agree (4)<br>Agree (3)<br>Neither agree nor disagree (2)<br>Disagree (1)<br>Strongly disagree (0) |
| ASTIGP5 | You worry that in this community most people with HIV are rejected when others learn | Strongly agree (4)<br>Agree (3)<br>Neither agree nor disagree (2)<br>Disagree (1)<br>Strongly disagree (0) |
| ASTIGP6 | You worry that in this community people believe a person who has HIV is dirty        | Strongly agree (4)<br>Agree (3)<br>Neither agree nor disagree (2)<br>Disagree (1)<br>Strongly disagree (0) |

**[ONLY FOR THOSE WHO SAID THEY PREVIOUSLY TESTED HIV POSITIVE] HIVT5=1**

*Next, I want you to think how likely is it that people would treat you in the following ways in the future because of your HIV status. I want to know how likely or unlikely you think each of the following things are.*

|          |                                                      |                                                                                                       |
|----------|------------------------------------------------------|-------------------------------------------------------------------------------------------------------|
| ASTIGP7  | Family members would avoid you                       | Very likely (4)<br>Likely (3)<br>Neither likely nor unlikely (2)<br>Unlikely (1)<br>Very unlikely (0) |
| ASTIGP8  | Family members would look down on you.               | Very likely (4)<br>Likely (3)<br>Neither likely nor unlikely (2)<br>Unlikely (1)<br>Very unlikely (0) |
| ASTIGP9  | Family members would treat you differently.          | Very likely (4)<br>Likely (3)<br>Neither likely nor unlikely (2)<br>Unlikely (1)<br>Very unlikely (0) |
| ASTIGP10 | Healthcare workers will not listen to your concerns. | Very likely (4)<br>Likely (3)<br>Neither likely nor unlikely (2)<br>Unlikely (1)<br>Very unlikely (0) |
| ASTIGP11 | Healthcare workers will avoid touching you.          | Very likely (4)<br>Likely (3)<br>Neither likely nor unlikely (2)<br>Unlikely (1)<br>Very unlikely (0) |
| ASTIGP12 | Healthcare workers will treat you with less respect. | Very likely (4)<br>Likely (3)<br>Neither likely nor unlikely (2)<br>Unlikely (1)<br>Very unlikely (0) |

**[ONLY FOR THOSE WHO SAID THEY PREVIOUSLY TESTED HIV POSITIVE] HIVT5=1**

*I want to understand if you have experienced some things people with HIV may have experienced. I am going to read you some statements and I want you to tell me how much you agree with them.*

|          |                                                    |                                                                   |
|----------|----------------------------------------------------|-------------------------------------------------------------------|
| ENSTIGP1 | You have lost friends by telling them you have HIV | Strongly agree (4)<br>Agree (3)<br>Neither agree nor disagree (2) |
|----------|----------------------------------------------------|-------------------------------------------------------------------|

|          |                                                                                         |                                                                                                            |
|----------|-----------------------------------------------------------------------------------------|------------------------------------------------------------------------------------------------------------|
|          |                                                                                         | Disagree (1)<br>Strongly disagree (0)                                                                      |
| ENSTIGP2 | You have been hurt by how people reacted to learning you have HIV                       | Strongly agree (4)<br>Agree (3)<br>Neither agree nor disagree (2)<br>Disagree (1)<br>Strongly disagree (0) |
| ENSTIGP3 | You stopped socializing with some people due to their reactions to knowing you have HIV | Strongly agree (4)<br>Agree (3)<br>Neither agree nor disagree (2)<br>Disagree (1)<br>Strongly disagree (0) |
| ENSTIGP4 | People you care about stopped calling after learning you have HIV                       | Strongly agree (4)<br>Agree (3)<br>Neither agree nor disagree (2)<br>Disagree (1)<br>Strongly disagree (0) |
| ENSTIGP5 | People seem afraid of you because you have HIV                                          | Strongly agree (4)<br>Agree (3)<br>Neither agree nor disagree (2)<br>Disagree (1)<br>Strongly disagree (0) |
| ENSTIGP6 | Some people who know you have HIV have grown more distant                               | Strongly agree (4)<br>Agree (3)<br>Neither agree nor disagree (2)<br>Disagree (1)<br>Strongly disagree (0) |

|           |                                                                                     |                                                                                                            |
|-----------|-------------------------------------------------------------------------------------|------------------------------------------------------------------------------------------------------------|
| ENSTIGP7  | HIV is different than other diseases like cancer because people with HIV are judged | Strongly agree (4)<br>Agree (3)<br>Neither agree nor disagree (2)<br>Disagree (1)<br>Strongly disagree (0) |
| ENSTIGP8  | People assume you have done something bad to get HIV                                | Strongly agree (4)<br>Agree (3)<br>Neither agree nor disagree (2)<br>Disagree (1)<br>Strongly disagree (0) |
| ENSTIGP9  | People blame you for having HIV                                                     | Strongly agree (4)<br>Agree (3)<br>Neither agree nor disagree (2)<br>Disagree (1)<br>Strongly disagree (0) |
| ENSTIGP10 | People think you are a bad person because you have HIV                              | Strongly agree (4)<br>Agree (3)<br>Neither agree nor disagree (2)<br>Disagree (1)<br>Strongly disagree (0) |
| ENSTIGP11 | You feel abandoned by family members because you have HIV                           | Strongly agree (4)<br>Agree (3)<br>Neither agree nor disagree (2)<br>Disagree (1)<br>Strongly disagree (0) |
| ENSTIGP12 | People avoid you because you have HIV                                               | Strongly agree (4)<br>Agree (3)<br>Neither agree nor disagree (2)<br>Disagree (1)<br>Strongly disagree (0) |

*How often have people treated you in the following ways because of your HIV status?*

|           |                                         |                                                                                 |
|-----------|-----------------------------------------|---------------------------------------------------------------------------------|
| ENSTIGP13 | Family members have avoided you.        | Very often (4)<br>Often (3)<br>Somewhat often (2)<br>Not often (1)<br>Never (0) |
| ENSTIGP14 | Family members have looked down on you. | Very often (4)<br>Often (3)                                                     |

|           |                                                       |                                                                                 |
|-----------|-------------------------------------------------------|---------------------------------------------------------------------------------|
|           |                                                       | Somewhat often (2)<br>Not often (1)<br>Never (0)                                |
| ENSTIGP15 | Family members have treated you differently           | Very often (4)<br>Often (3)<br>Somewhat often (2)<br>Not often (1)<br>Never (0) |
| ENSTIGP16 | Healthcare workers have not listened to your concerns | Very often (4)<br>Often (3)<br>Somewhat often (2)<br>Not often (1)<br>Never (0) |
| ENSTIGP17 | Healthcare workers have avoided touching you          | Very often (4)<br>Often (3)<br>Somewhat often (2)<br>Not often (1)<br>Never (0) |
| ENSTIGP18 | Healthcare workers have treated you will less respect | Very often (4)<br>Often (3)<br>Somewhat often (2)<br>Not often (1)<br>Never (0) |

**Pregnancy intentions and Fertility Desires**

*Next I will ask you about having children*

|     |                                                                                                                     |                                                                                                                                         |
|-----|---------------------------------------------------------------------------------------------------------------------|-----------------------------------------------------------------------------------------------------------------------------------------|
| FD1 | [Women only] Are you pregnant now?                                                                                  | Yes(1)<br>No(0)                                                                                                                         |
| FD2 | [Men only] Are any of your partners pregnant now?                                                                   | Yes(1)<br>No(0)<br>I don't have a partner(7)                                                                                            |
| FD3 | [Women] When do you want to be pregnant (again)?                                                                    | Within 6 months(0)<br>Within 12 months<br>1 to 2 years<br>greater than 2 years<br>You do not want to get pregnant again(4)              |
| FD4 | [MEN] When do you want your partner to become pregnant again?<br>[skip if answered "I don't have a partner" to FD3] | Within 6 months(0)<br>Within 12 months<br>1 to 2 years<br>Greater than 2 years<br>You do not want your partner to get pregnant again(4) |
| FD5 | How many <u>more</u> children do you want to have?<br>(If none enter 0)                                             |                                                                                                                                         |

*Now I will ask you some questions about family planning. When I say family planning I mean any method used to prevent pregnancy including: condoms, pills, injections, tubal ligation, vasectomy, male partner "releasing from outside," IUD/coils, implant, counting days, and emergency contraception (morning after pill)*

**Use of Family Planning Services**

|     |                                                                                            |                                                                                                                                                                                                                         |
|-----|--------------------------------------------------------------------------------------------|-------------------------------------------------------------------------------------------------------------------------------------------------------------------------------------------------------------------------|
| FP1 | [WOMEN] Which family planning method(s) are you currently using?<br>(chose all that apply) | Condoms (0)<br>Oral (pills)<br>Injections<br>Counting days<br>Tubal ligation<br>Partner had vasectomy<br>Releasing from outside<br>Interuterine device (IUD)/coils<br>Implant<br>Emergency contraception(9)<br>None(77) |
|-----|--------------------------------------------------------------------------------------------|-------------------------------------------------------------------------------------------------------------------------------------------------------------------------------------------------------------------------|

|     |                                                                                                                           |                                                                                                                                                                                                                                              |
|-----|---------------------------------------------------------------------------------------------------------------------------|----------------------------------------------------------------------------------------------------------------------------------------------------------------------------------------------------------------------------------------------|
|     |                                                                                                                           | I don't know(99)                                                                                                                                                                                                                             |
| FP2 | [WOMEN] How long have you been using this method?                                                                         | Less than one week(0)<br>One week to less than one month<br>One month to less than 3 months<br>3 months to less than 6 months<br>More than 6 months(6)                                                                                       |
| FP3 | [MEN] Which family planning method(s) is your partner currently using?<br>(Choose all that apply)                         | Condoms (0)<br>Oral (pills)<br>Injections<br>Counting days<br>Tubal ligation<br>I have had a vasectomy<br>Releasing from outside<br>Intrauterine device (IUD)/coils<br>Implant<br>Emergency contraception(9)<br>None(77)<br>I don't know(99) |
| FP4 | [MEN] How long has your partner been using this method?                                                                   | Less than one week(0)<br>One week to less than one month<br>One month to less than 3 months<br>3 months to less than 6 months<br>More than 6 months(4)<br>I don't know(99)                                                                   |
| FP5 | [WOMEN] In the future which family planning services would you like to use? (Choose all that apply)                       | Condoms (0)<br>Oral (pills)<br>Injections<br>Counting days<br>Tubal ligation<br>Vasectomy<br>Releasing from outside<br>Intrauterine device (IUD)/coils<br>Implant<br>Emergency contraception(9)<br>None(77)<br>I don't know(99)              |
| FP6 | [MEN] In the future which family planning services would you like you/your partner or you to use? (Choose all that apply) | Condoms (0)<br>Oral (pills)<br>Injections<br>Counting days<br>Tubal ligation<br>Vasectomy<br>Releasing from outside<br>Intrauterine device (IUD)/coils<br>Implant<br>Emergency contraception(9)<br>None(77)<br>I don't know(99)              |
| FP7 | In the future do you plan to use family planning?                                                                         | Definitely no (0)<br>Probably no (1)<br>Maybe (2)<br>Probably yes (3)<br>Definitely yes (4)                                                                                                                                                  |



| Construct                                                                                              | Source                                                                                                                                                                                                                                                                                                                                                                                                                                                                                                                                                                                                                                                                                                                                                                                                                                                                                                                                                                                                                                                                                                                                                                                                                                                                                                                                                                                                                                                                                                                                                                                                                                                                                                                    |
|--------------------------------------------------------------------------------------------------------|---------------------------------------------------------------------------------------------------------------------------------------------------------------------------------------------------------------------------------------------------------------------------------------------------------------------------------------------------------------------------------------------------------------------------------------------------------------------------------------------------------------------------------------------------------------------------------------------------------------------------------------------------------------------------------------------------------------------------------------------------------------------------------------------------------------------------------------------------------------------------------------------------------------------------------------------------------------------------------------------------------------------------------------------------------------------------------------------------------------------------------------------------------------------------------------------------------------------------------------------------------------------------------------------------------------------------------------------------------------------------------------------------------------------------------------------------------------------------------------------------------------------------------------------------------------------------------------------------------------------------------------------------------------------------------------------------------------------------|
| Demographics and SES                                                                                   | From DHS/AIS and Constructed                                                                                                                                                                                                                                                                                                                                                                                                                                                                                                                                                                                                                                                                                                                                                                                                                                                                                                                                                                                                                                                                                                                                                                                                                                                                                                                                                                                                                                                                                                                                                                                                                                                                                              |
| Prior use of healthcare services                                                                       | Constructed, used in prior studies in Uganda                                                                                                                                                                                                                                                                                                                                                                                                                                                                                                                                                                                                                                                                                                                                                                                                                                                                                                                                                                                                                                                                                                                                                                                                                                                                                                                                                                                                                                                                                                                                                                                                                                                                              |
| Prior access to HIV testing and linkage to care for those who reported knowing they were HIV positive. | Constructed, used in prior studies in Uganda                                                                                                                                                                                                                                                                                                                                                                                                                                                                                                                                                                                                                                                                                                                                                                                                                                                                                                                                                                                                                                                                                                                                                                                                                                                                                                                                                                                                                                                                                                                                                                                                                                                                              |
| HIV stigma                                                                                             | <p><b>Adapted from:</b></p> <p><b>For those who said they previously tested HIV negative, did not know their HIV status, did not remember prior results, or declined to answer</b></p> <p>Kalichman et al. (2005). Development of a Brief Scale to Measure AIDS-Related Stigma in South Africa. <i>AIDS and Behavior</i>, 9, 135-143.</p> <p>Berger BE, Ferrans CE, Lashley FR. Measuring stigma in people with HIV: Psychometric assessment of the HIV stigma scale. <i>Research in Nursing &amp; Health</i>. 2001;24:518-529.</p> <p>Earnshaw, VA, Smith, LR, Chaudoir SR, Amico, KR, Copenhaver, MM. HIV stigma mechanisms and well being among PLWH: A test of the HIV stigma framework. <i>AIDS and Behavior</i>. 2013; 17, 1785-1795.</p> <p><b>For those who said they previously tested HIV positive</b></p> <p>Berger BE, Ferrans CE, Lashley FR. Measuring stigma in people with HIV: Psychometric assessment of the HIV stigma scale. <i>Research in Nursing &amp; Health</i>. 2001;24:518-529.</p> <p>Sayles J, Hays R, Sarkisian C, Mahajan A, Spritzer K, Cunningham W. Development and Psychometric Assessment of a Multidimensional Measure of Internalized HIV Stigma in a Sample of HIV-positive Adults. <i>AIDS and Behavior</i>. 2008/09/01 2008;12(5):748-758.</p> <p>Earnshaw, VA, Smith, LR, Chaudoir SR, Amico, KR, Copenhaver, MM. HIV stigma mechanisms and well being among PLWH: A test of the HIV stigma framework. <i>AIDS and Behavior</i>. 2013; 17, 1785-1795.</p> <p>Kalichman SC, Simbayi LC, Cloete A, Mthembu PP, Mkhonta RN, Ginindza T. Measuring AIDS stigmas in people living with HIV/AIDS: the Internalized AIDS-Related Stigma Scale. <i>AIDS Care</i>. 2009;21(1):87-93.</p> |
| Fertility, fertility desires, contraceptive use                                                        | Adapted from: Rosengard C, Phipps MG, Adler NE, Ellen JM (2004) Adolescent pregnancy intentions and pregnancy outcomes: A longitudinal examination. <i>J Adolesc Health</i> 35:453-461.<br>and used adapted items in prior studies in Uganda                                                                                                                                                                                                                                                                                                                                                                                                                                                                                                                                                                                                                                                                                                                                                                                                                                                                                                                                                                                                                                                                                                                                                                                                                                                                                                                                                                                                                                                                              |
